# Supplementary material for: Psychosis REACH: Effects of a Brief CBT-Informed Training for Family and Caregivers of Individuals With Psychosis
Source: Atypon-hosted journal article supplement (doi:10.1176/appi.ps.202000740), 2021-05-21
Supplement: appi.ps.202000740.ds001.pdf [file appi.ps.202000740.ds001.pdf]

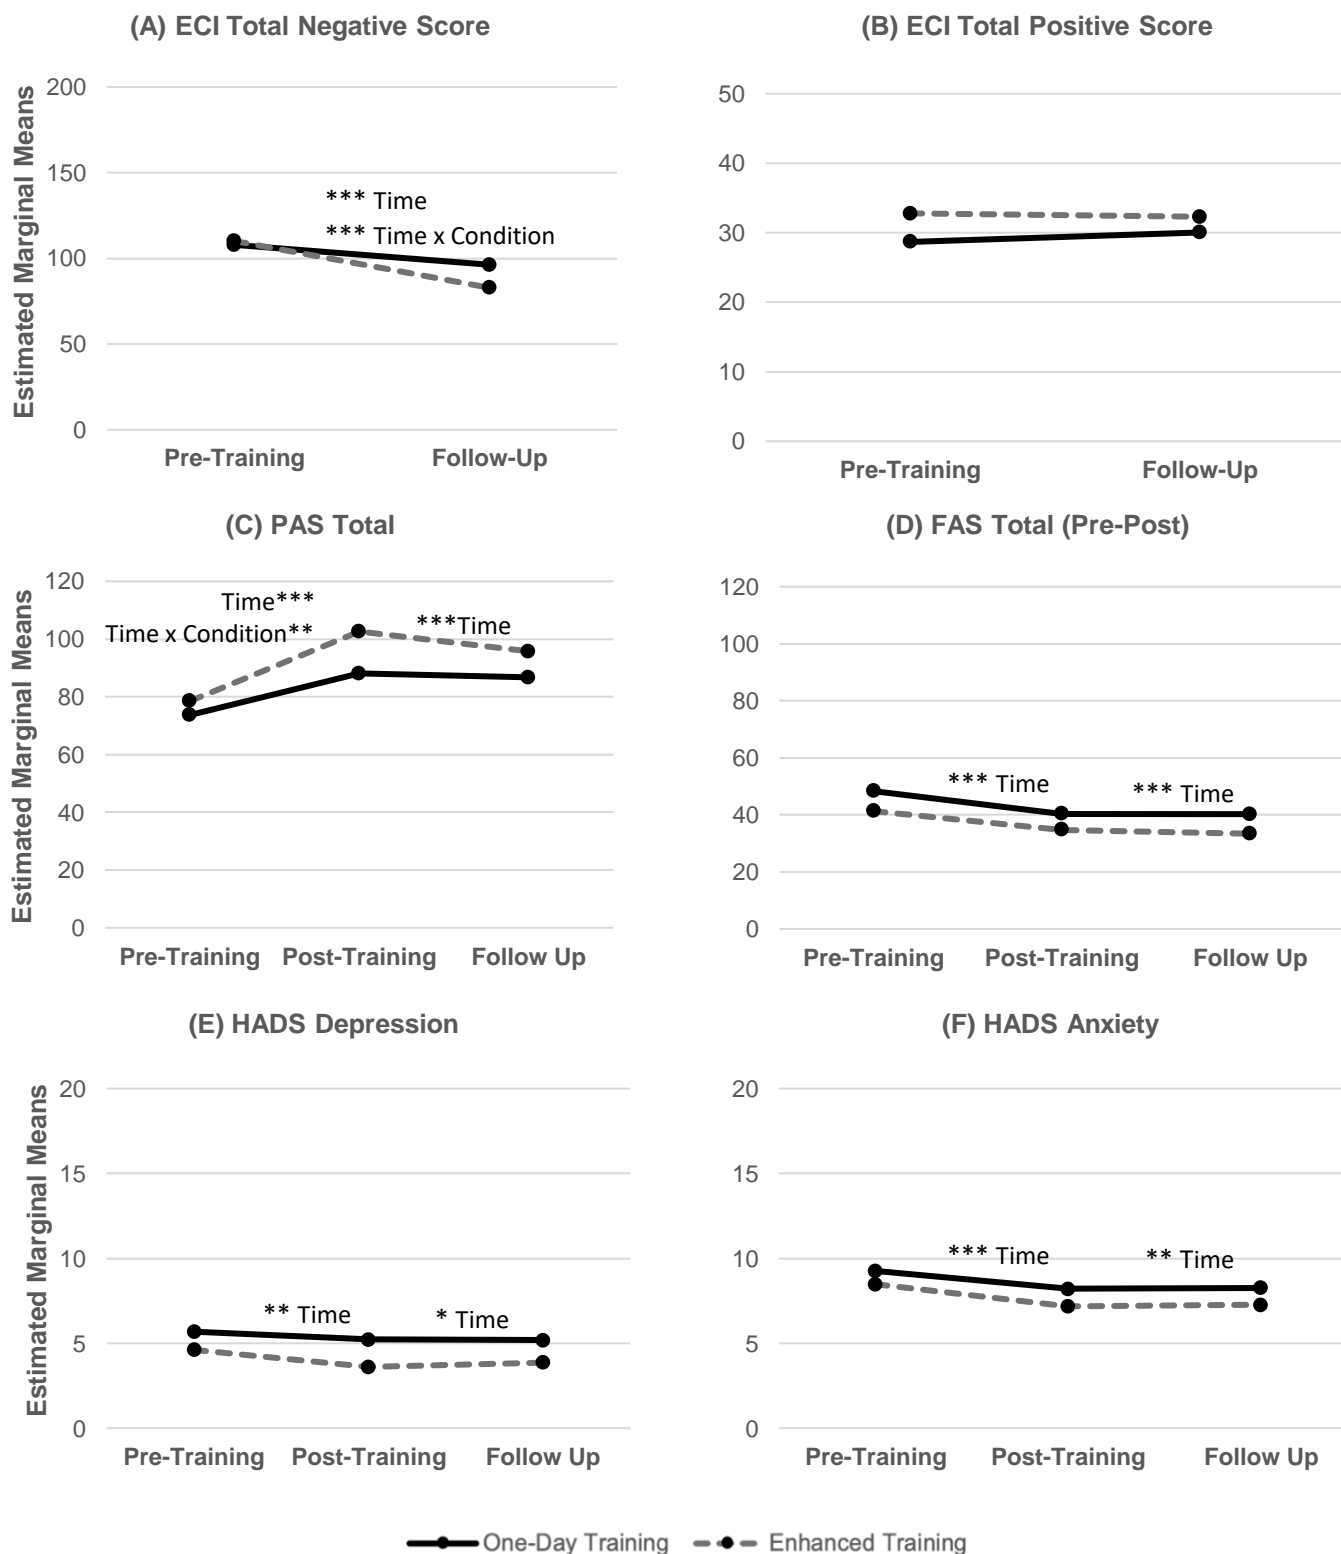

Figure 1. Mixed ANOVA plots for Experience of Caregiving Inventory (ECI; panels A-B), Psychosis Attitude Scale (PAS; panel C), Family Attitude Survey (FAS; panel D), and Hospital Anxiety and Depression Scale (HADS; panels E-F). \* $p < .05$ , \*\* $p < .01$ , \*\*\* $p < .001$ . Time = Significant main effect of time (i.e. significant change from baseline for the full sample), Time x Condition = Significant Time-by-Condition interaction (i.e. significant difference between conditions in the amount of change from baseline). Corresponds to Pre Training-Post Training and Pre Training -Follow Up mixed ANOVAs. Main effects of Condition are not shown and are displayed in Table 4.

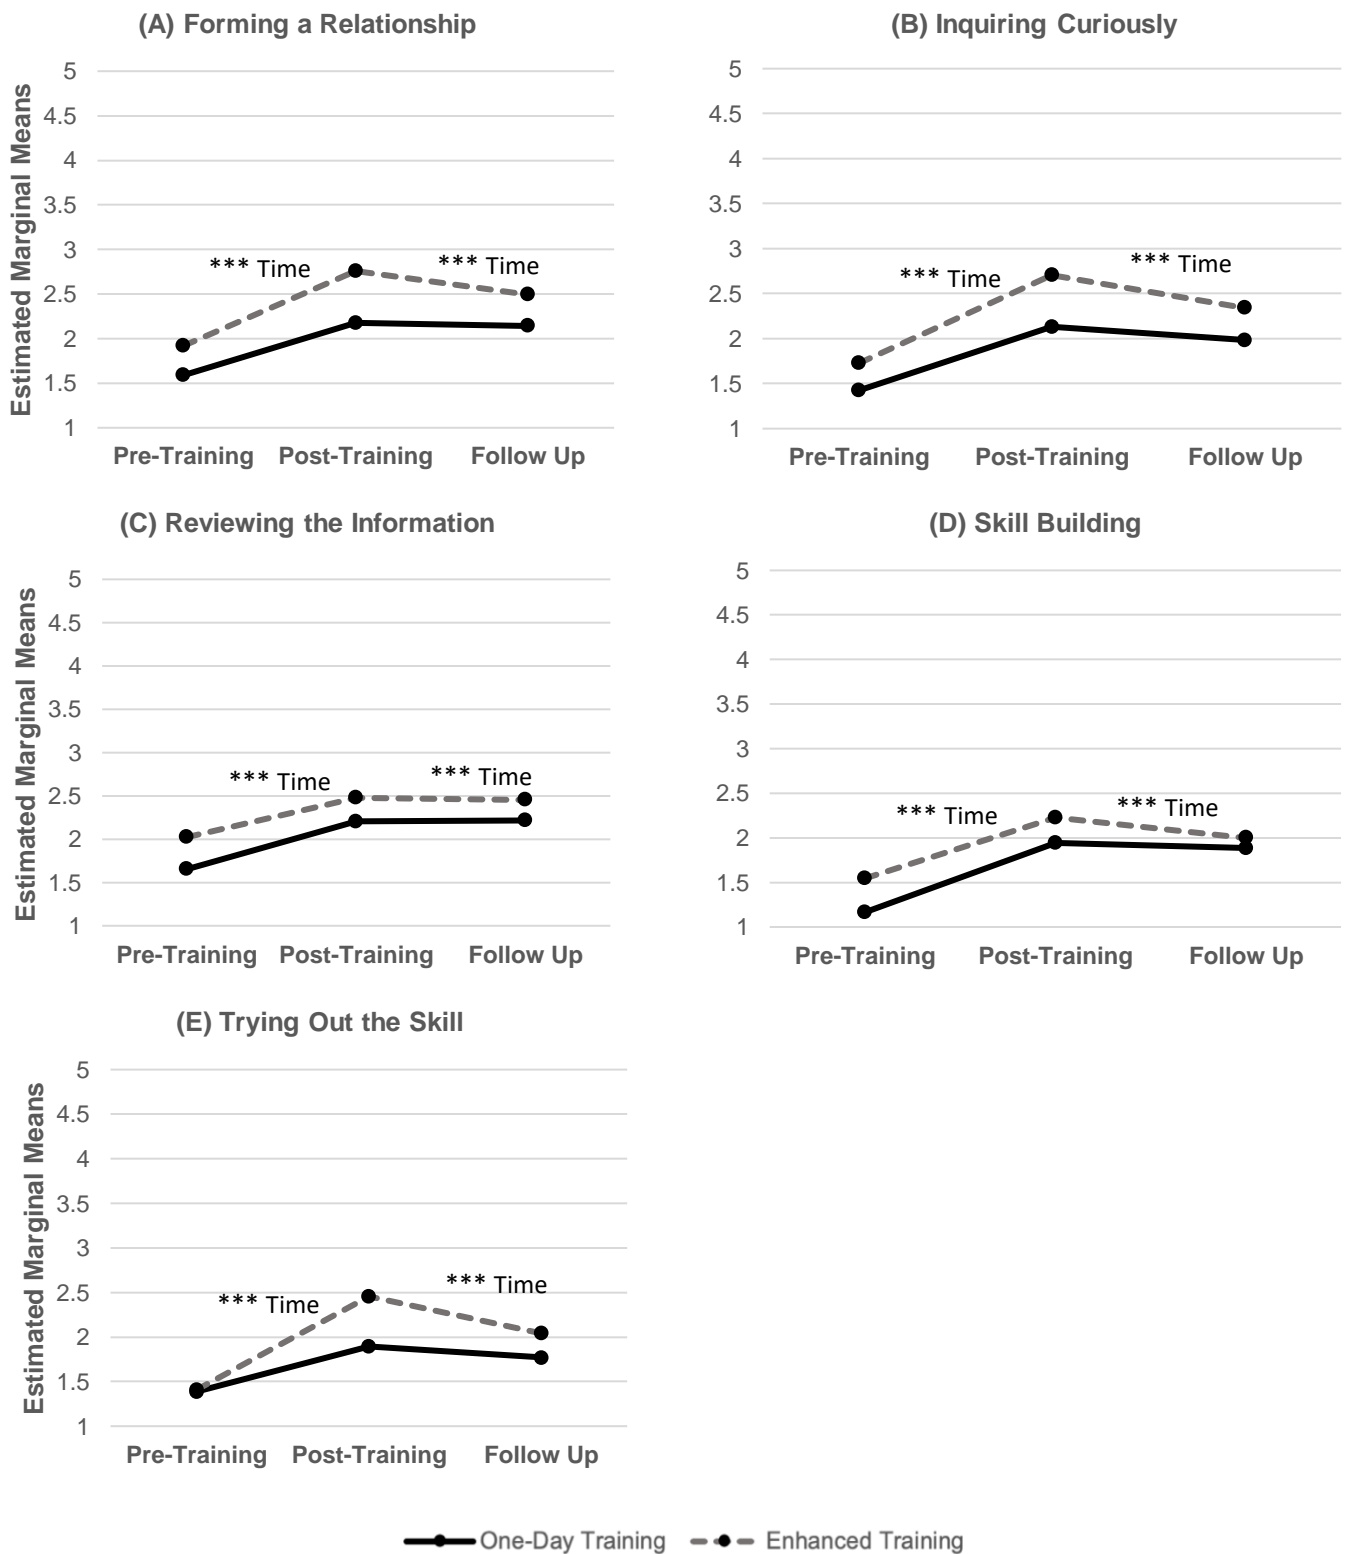

Figure 2. Mixed ANOVA plots for CBTp-informed FIRST skills. \* $p < .05$ , \*\* $p < .01$ , \*\*\* $p < .001$ . Time = Significant main effect of time (i.e. significant change from baseline for the full sample). Main effects of Condition are not shown and are displayed in Table 4.
